# Supplementary material
Source: PubMed Central journal article supplement (PMC4634049)
Supplement: supp_pp.15.00499_PP2015-00499R1_Supplemental_Material.pdf [file supp_pp.15.00499_PP2015-00499R1_Supplemental_Material.pdf]

**Table S1**

Summary of outputs generated from different trans-membrane prediction algorithms used to analyse the **VviCCC** full-length amino acid sequence.

| <b>Server</b>       | <b>Number of TM Helices</b> | <b>Website</b>                                                                                                                      |
|---------------------|-----------------------------|-------------------------------------------------------------------------------------------------------------------------------------|
| SOSUI               | 11                          | <a href="http://bp.nuap.nagoya-u.ac.jp/sosui/">http://bp.nuap.nagoya-u.ac.jp/sosui/</a>                                             |
| TMHMM V2.0          | 11                          | <a href="http://www.cbs.dtu.dk/services/TMHMM/">www.cbs.dtu.dk/services/TMHMM/</a>                                                  |
| HMMTOP              | 11                          | <a href="http://www.enzim.hu/hmmtop/">http://www.enzim.hu/hmmtop/</a>                                                               |
| TopPred             | 11 (12th putative)          | <a href="http://mobyli.pasteur.fr/cgi-bin/portal.py?#forms::toppred">http://mobyli.pasteur.fr/cgi-bin/portal.py?#forms::toppred</a> |
| PSIPRED (MEMSTAT 3) | 11                          | <a href="http://bioinf.cs.ucl.ac.uk/psipred/">http://bioinf.cs.ucl.ac.uk/psipred/</a>                                               |

**Table S2**

Accession numbers of plant *CCC* genes used for multiple sequence alignment.

| <b>Species</b>              | <b>Accession</b> | <b>References</b>             |
|-----------------------------|------------------|-------------------------------|
| <i>Arabidopsis thaliana</i> | NP_849732        | Colmenero-Flores et al., 2007 |
| <i>Oryza sativa</i>         | ADB03187.1       | Kong et al., 2011             |
| <i>Nicotiana tabacum</i>    | AAC49874.1       | Harling et al., 1997          |
| <i>Vitis vinifera</i>       | VIT10s0003g04530 | This study                    |
| <i>Lotus tenuis</i>         | ACE78321.1       | Teakle et al., unpublished    |
| <i>Citrus clementina</i>    | CBJ19439.1       | Brumos et al., 2010           |

**Table S3**

Primers used in this study.

| Gene                                          | Primer          | Primer Sequence 5'-3'     | NCBI accession number | Application                                           | Product size (bp) |
|-----------------------------------------------|-----------------|---------------------------|-----------------------|-------------------------------------------------------|-------------------|
| <i>VviCCC</i>                                 | Forward         | ATGGACAACGGAGACATTGAA     | XM_002274763          | Cloning                                               | 2949              |
|                                               | Reverse         | CTATGTGAAAAGGGTGACAACAT   |                       |                                                       |                   |
|                                               | Reverse no stop | TGTGAAAAGGGTGACAACATCT    |                       |                                                       |                   |
| <i>VviCCC::YFP</i>                            | Reverse         | CTAGATAGATCTCTGTACAGCTCGT | XM_002274763          | Cloning                                               | 3714              |
| <i>VviACT1<sup>a</sup></i>                    | Forward         | CTTGCATCCCTCAGCACCTT      | XM_002282480          | qRT-PCR                                               | 82                |
|                                               | Reverse         | TCCTGTGGACAATGGATGGA      |                       |                                                       |                   |
| <i>VviEF1-<math>\alpha</math><sup>b</sup></i> | Forward         | GAACTGGGTGCTTGATAGGC      | XM_002284888          | qRT-PCR                                               | 150               |
|                                               | Reverse         | AACCAAAATATCCGGAGTAAAGA   |                       |                                                       |                   |
| <i>VviUBQ-L40<sup>a</sup></i>                 | Forward         | CATAACATTTGCGGCAGATCA     | XM_002273532          | qRT-PCR                                               | 80                |
|                                               | Reverse         | TGGTGGTATTATTGAGCCATCCTT  |                       |                                                       |                   |
| <i>VviCCC</i>                                 | Forward         | CCACCTCTCAACCACCCAG       | XM_002274763          | qRT-PCR<br>RT-PCR                                     | 104               |
|                                               | Reverse         | ACAACATCTCTACGGTATCCCCT   |                       |                                                       |                   |
| <i>AtActin2</i>                               | Forward         | TGAGCAAAGAAATCACAGCACT    | At3g18780             | qRT-PCR<br>RT-PCR                                     | 166               |
|                                               | Reverse         | CCTGGACCTGCCTCATCATA      |                       |                                                       |                   |
| <i>AtCCC</i>                                  | Forward         | ATAGCGGCGACATTGAAGAAG     | At1g30450             | RT-PCR                                                | 325               |
|                                               | Reverse         | GATGGTGCCTGAATTTGCTC      |                       |                                                       |                   |
| <i>AtCCC</i>                                  | LP              | CCATTGACTCAAATCAGACGG     | At1g30450             | Screening<br>Salk line for<br>homozygous<br>insertion | 983 or<br>450-570 |
|                                               | RP              | TTGTTTTCCGTTAATTCGTCG     |                       |                                                       |                   |
|                                               | LBa1            | TGGTTCACGTAGTGGCCATCG     |                       |                                                       |                   |

<sup>a</sup> Designed by Reid et al., (2006)

<sup>b</sup> Designed by Terrier et al., (2005)

**Reid K, Olsson N, Schlosser J, Peng F, Lund S (2006)** An optimized grapevine RNA isolation procedure and statistical determination of reference genes for real-time RT-PCR during berry development. *BMC Plant Biology* **6**: 27

**Terrier N, Glissant D, Grimplet J, Barrieu F, Abbal P, Couture C, Ageorges A, Atanassova R, Léon C, Renaudin J-P, Dédaldéchamp F, Romieu C, Delrot S, Hamdi S (2005)** Isogene specific oligo arrays reveal multifaceted changes in gene expression during grape berry (*Vitis vinifera* L.) development. *Planta* **222**: 832-847

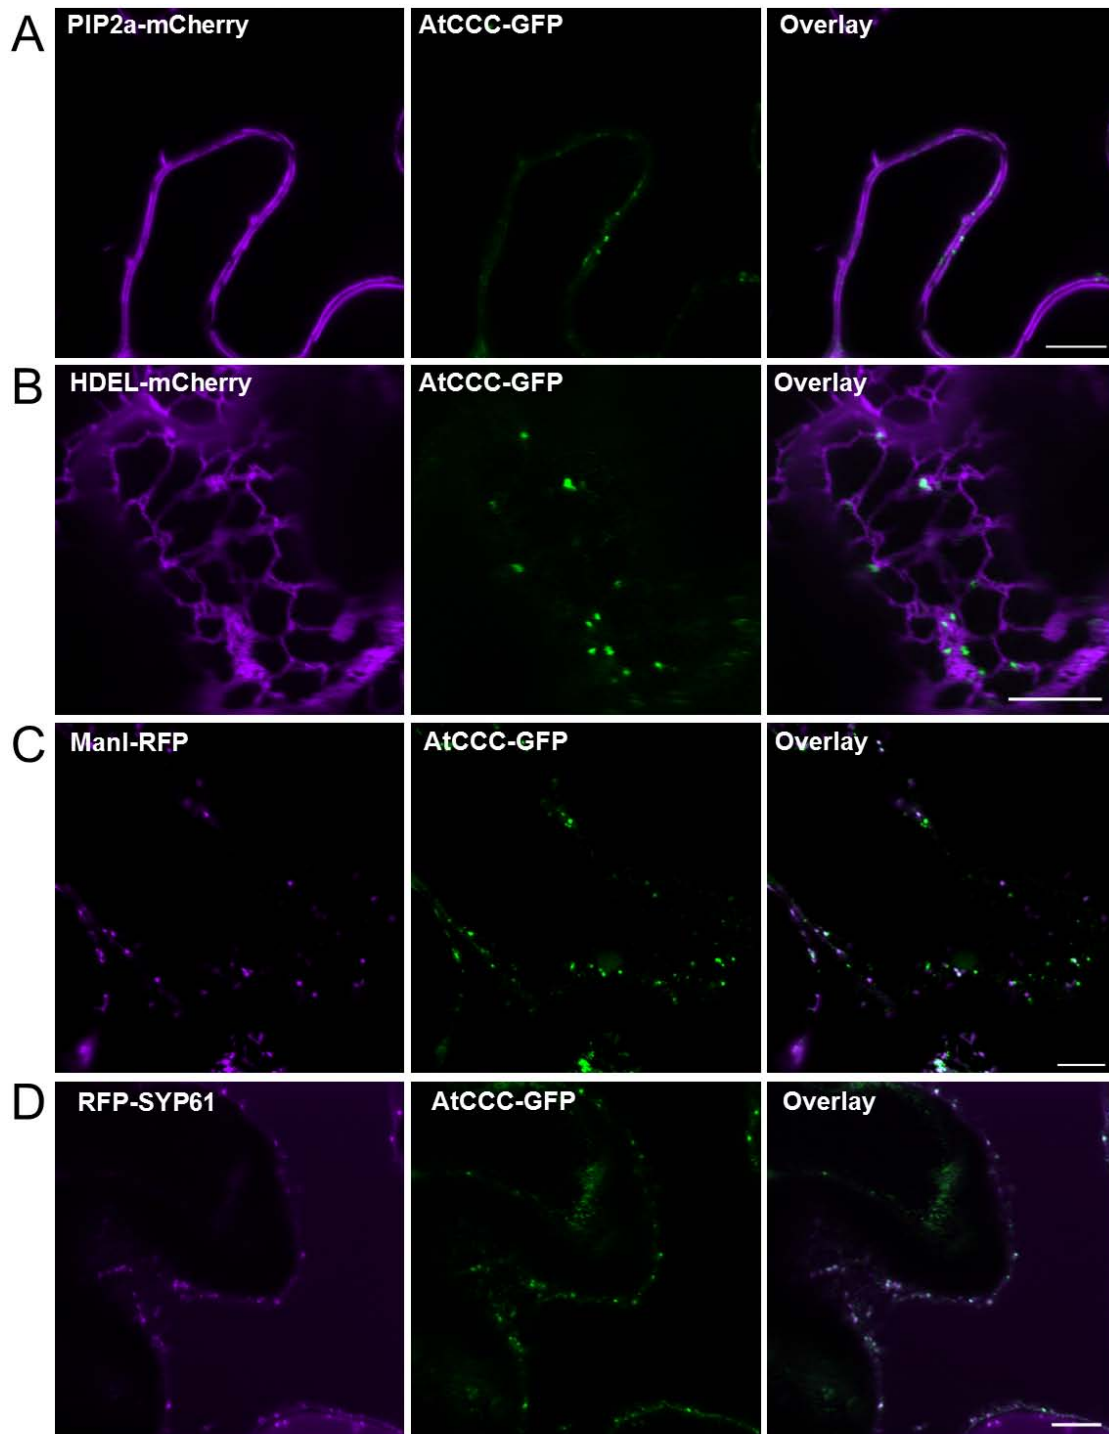

**Figure S1**

Transient co-expression of AtCCC-GFP with various subcellular markers in epidermal cells of *Nicotiana benthamiana*. *N. benthamiana* leaves were co-infiltrated with *A. tumefaciens* strains harbouring AtCCC-GFP and either the plasma membrane-marker AtPIP2a-mCherry (A), ER marker HDEL-mCherry (B), Golgi marker Man1-RFP (C) or TGN-marker RFP-SYP61 (D). Leaf sections were imaged by confocal laser scanning microscopy. mCherry- and RFP-signals are shown in magenta in the left panel. GFP-signals are shown in green in the middle panel. Co-localization of green and magenta signals appears in white in the right panel. Scale bar = 10  $\mu$ m.

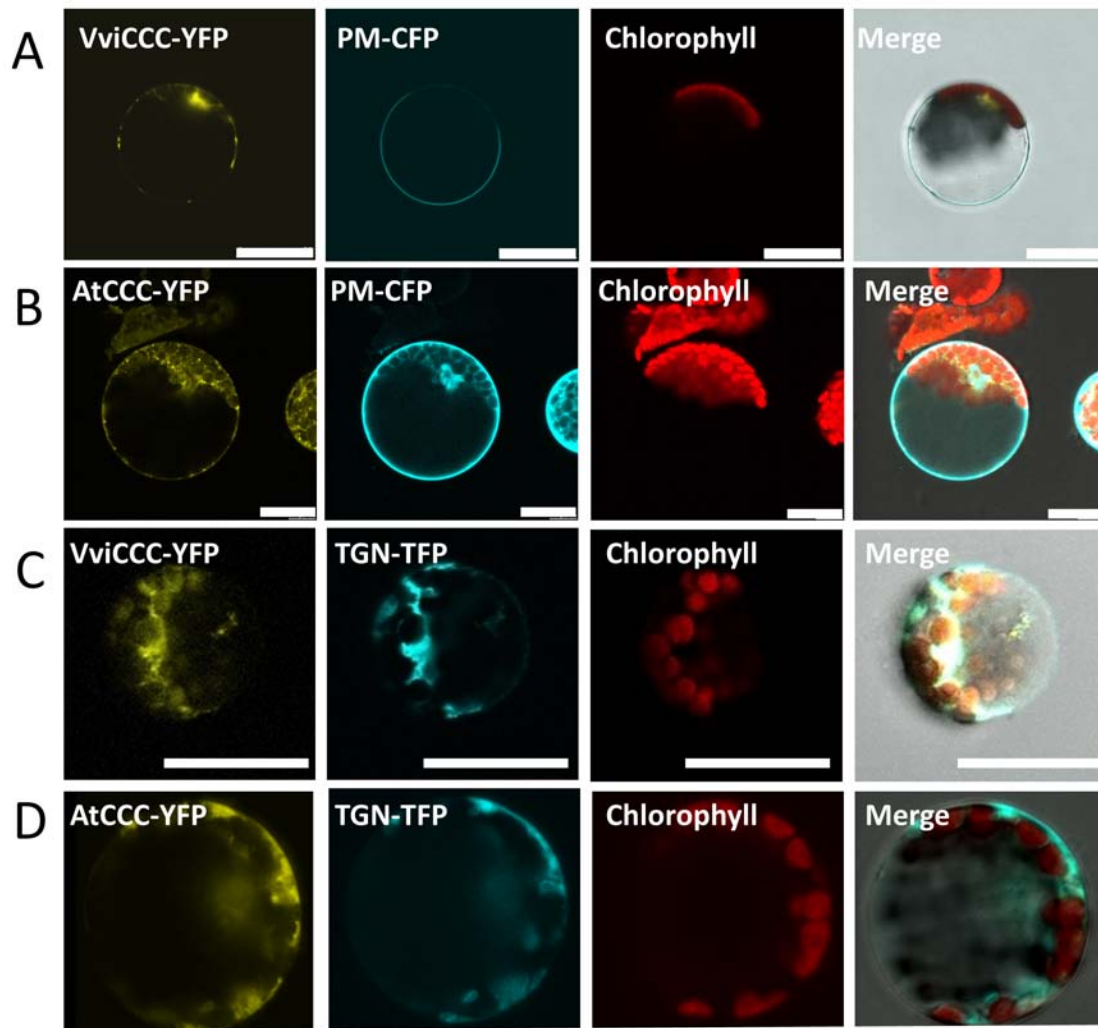

**Figure S2**

Subcellular localisation of VviCCC and AtCCC in *Arabidopsis* mesophyll protoplasts. Protoplasts were transiently co-transfected with the PM marker Rop11-CFP and (A) VviCCC-YFP (Scale = 25  $\mu\text{m}$ ) or (B) AtCCC-YFP (Scale = 20  $\mu\text{m}$ ), or the TGN marker Vti12-TFP and (C) VviCCC-YFP (Scale = 20  $\mu\text{m}$ ) or (D) AtCCC-YFP. Protoplasts were imaged by confocal laser scanning microscopy. Fluorescent signals are indicated within each panel. Merged images include the brightfield channel.

### Figure S3

cDNA coding sequences of *VviCCC* from K51-40 and 140-Ruggeri. Heterozygous regions within the cDNAs that do not affect the amino acid sequence of their respective proteins are shown in red. The only nucleotide polymorphism that could result in an amino acid change is conserved between rootstocks, and this is shown in blue.

#### Coding sequence of *VviCCC* from K51-40

```
ATGGACAACGGAGACATTGAAAACGCGGAAGACGAGTTCGGCGGGCAAAGCGGACGCAAATACAGACCAGTCGT
CTCGCATGACCGCGCTGTCTCCAAATGCCTCTTTGGATTCCGGATCTTCCTCTTCTCTCCCCGTCCCTCAATCACC
TTTCACGAACCTTAAAATAAGCATGCAGGGAAACATGAGTTCGTATGCAAGAGAAGAGTCATCTACTAATCATGA
AGAACTCAATGGTTCTGAAAGAGAATCCAAATTGGAATTGTTCCGGTTTTGACTCTTTGTTAATATTCTAGGTCTTA
AGAGTATGACAGGGGAGGCAATTGCAGCTCC TCGAGTCTAGAGATGGCGAGGATGTTTCTA TATACACCTGG
GCGTTCCAAGGCTAATGATCTCAAATTAGGGACATTGATGGGAGTATTTGTGCCGTGCTTGCAAAAACATTTTAGGA
ATTATCTACTATATACGATTTTCTTGGATCGTTGGTATGGCAGGCATTGGTCAGTCGCTTTTGTGGTGTCTTTTGT
GGTTTGTGACTTTCCTGACTTCGATATCATTGAGTGCTATCGCAACTAATGGTGCAATGAAGGGTGGGGGGCCAT
ATTATCTCATTGGTCGTGCCCTTGGTCCAGAAGTTGGAGTTAGCATTGGACTATGTTTCTTCTTGGGAATGCAGTA
GCTGGATCTCTTTATGTGCTGGGAGCTGTAGAAACCTTCTTAGATGCCTTGCCAGGTGCTGGGATTTTGGAGAGG
TTGTCACAAAAAGTTAATGGCACAGAAGCTGCAGTGGCCGTTCCAAGTCCAAATTTGCATGACCTGCAAGTCTATGG
GATAGTTGTGACGATAATCCTATGCTTTATTGTGTTGGTGGTGTAAAGATGATCAATCGGGTTGCACCTGCTTTC
TTATACCTGTTTTATTCTCCTTGTCTGCATATTTGTTGGGGCTGTTTTGGCAAGAAAGGATCACCTGCTGTTGGA
GTCACTGGCTTGAGTTTGAAATCCTTAAAAGATAATTGGAGCTCGAGTTATCAAAATACTAATAATGCTGGAATAC
CTGATCCTGATGGAGCTGTAAGCTGGAATTTCAATGCACTGGTCGGTCTATTTTTCCCTGCTGTAACGGGAATTATG
GCAGGTTCAAATCGCTCTGCTTCATTGAGAGACACTCAACGTTCAATTCCTGTTGGAACATTGGCTGCGACTCTTC
TACTTCTGCAATGTACCTATTTTCTGTGCTTTTATTTGGATCTCTAGCAACAAGGGAGAAACTTTTGACAGACAGGC
TACTAACTGCTACAATTGCTTGGCCTTTACCGCAATTATTTACATTGGAATTATCCTTTCAACCTTAGGGGGCGCT
CTTCAAAGCCTTACAGGTGCTCCACGGCTGCTTGACGCAATAGCCAATGATGATATCCTTCTGTTCTTCTCATTACTT
CAGAGTTGCTGAAGGGAGTGAACCTCATATTGCAACCCTCTTACTGCATTAATCTGTATTGGGTGTGCATAATC
GGGAATCTGGATCTTATCACACCAACAATTACCATGTTTTTCTTTTGTGTTATGCTGGTGTGAACCTGTCTTGTCTC
CTTCTGGATCTTCTAGATGCTCCAGTTGGCGTCCACGATGGAAATTCACCACTGGAGCCTCTCTCTTGGAGC
AGTTCTTTGTATAGTGATCATGTTCTTGATATCTTGGTCATTTACTGTGGTGTCCCTAGCCCTTGCAAGTCTCATATA
TTATTATGTATGCATCAAAGGGAAGGCTGGGGACTGGGGTGTAGGCTTCAAGAGTGCATATTTCCAAGTACGCCCTT
CGTAGTCTTCGATCACTGGGGGCAAGCCAAGTGCACCCAAAGAACTGGTATCCTATCCCCCTCATATTCTGCCGGC
CATGGGGGAAGCTGCCAGAGAATGTGCCCTGCCACCCTAAATTAGCTGACTTTGCTAACTGCATGAAGAAAAAGG
GTCGTGGAATGTCCATTTTGTCTCTATTTTAGATGGAGATTACCATGAGTGTGCAGAAGATGCCAAGACAGCCTG
CAGGCAGCTGAGTACCTACATTGACTATAAGCGCTGTGAAGGTGTTGCAGAGATAGTTGTGGCCCCCAGTATGTCA
GATGGCTTCCGTGGCATTGTCCAAACTATGGGCCTAGGCAATCTTAAGCC GAAACATTGTGGTGCATGCGATACCC
GAAATATGGCGTCGGGAAAACCTAATTGAAATCCCAGTACCTTTGTTGGCATAATTAATGACTGCATTGTTGCAA
ACAAGGCAGTTGTGAT TCGTCAAGGCCTTGATGAATGGCCCAATGAGTATCAAAGGCAGTATGGTACTATTGAT
CTGTATTGGATTGTGAGAGATGGGGCCTTATGCTTCTCCTCTCCCA AGCTCCTCCTTACCAAGGAGAGCTTTGAG
AGTTGTAAGATTCAGGTCTTCTGCATTGCGGAGGAGGATTCTGATGCAGAGGAGCTCAAGGCTGATGTCAAGAAG
TTTTTGTATGATCTTCGCATGCATGCTGAAGTGATTGTTATATCGATGAAATCATGGGACGCCCAAGGAGAAGGAG
TGTCACAGCAAGATGAATCAATAGAGGCATTCACGGGTGCTCAGCGGCGGATTGCTGGTTACTTGAGTGAGATGA
AGGAGGCAGCTAAGAGGGAAGGAACTCCACTGATGGCTGATGGGAAATCTGTGTTGTGAATGAGCAACAGGTG
GAGAAATTTCTTTACACAACACTGAAGCTTAATTCGACAATACTTAGATACTCAAGAATGGCTGCAGTCGTGCTTG
```

TGAGCTTACCACCACCACCTCTCAACCACCAGCGTATTTCTACATGGAGTACATGGATCTTTTGGTAGAGAATGT  
ACCTAGGCTTTTGATGGTAAGGGGATACCGTAGAGATGTTGTCACCCTTTTCACATAG

### Coding sequence of *Vv*CCC from 140 Ruggeri

ATGGACAACGGAGACATTGAAAACGCGGAAGACGAGTTCCGGCGGGCAAAGCGGACGCAAATACAGACCAGTCGT  
CTCGCATGACCGCGCTGTTCTCAAATGTCCTCTTTGGATTCCGGATCTTCCTCTTCTCTCCCCGTCCCTCAATCACC  
TTTACGAACCTTAAAATAAGCATGCAGGGAAACATGAGTTCTGATGCAAGAGAAGAGTCATCTACTAATCATGA  
AGAACTCAATGGTTCTGAAAGAGAATCCAAATTGGAATTGTTCCGTTTTGACTCTCTTGTTAATATTCTAGGTCTTA  
AGAGTATGACAGGGGAGGCAATTGCAGCTCCTTCGAGTCTTAGAGATGGCGAGGATGTTTCTAATAACCTGGG  
CGTTCCAAGGCTAATGATCTCAAATTAGGGACATTGATGGGAGTATTTGTGCCGTGCTTGCAAAACATTTTAGGAA  
TTATCTACTATATACGATTTTCTTGGATCGTTGGTATGGCAGGCATTGGTCAGTCGCTTTTGTGGTGTCTTTTGTG  
GTTTGTGACTTTCTGACTTCGATATCATTGAGTGTATCGCAACTAATGGTGAATGAAGGGTGGGGGGCCATA  
TTATCTCATTGGTCGTGCCCTTGGTCCAGAAGTTGGAGTTAGCATTGGACTATGTTTCTTCCTTGGGAATGCAGTAG  
CTGGATCTCTTATGTGCTGGGAGCTGTAGAAACCTTCTTAGATGCCTTGCCAGGTGCTGGGATTTTTGGAGAGGT  
GTCACAAAAGTTAATGGCACAGAAGCTGCAGTGGCCGTTCCAAGTCCAAATTTGCATGACCTGCAAGTCTATGGG  
ATAGTTGTGACGATAATCCTATGCTTATTGTGTTTGGTGGTGTAAAGATGATCAATCGGGTGCACCTGCTTTCCT  
TATACCTGTTTTATTCTCCTTGTCTGCATATTTGTTGGGGCTGTTTTGGCAAGAAAGGATCACCTGCTGTTGGAG  
TCACTGGCTTGAGTTTGAATCCTTAAAAGATAATTGGAGCTCGAGTTATCAAAATACTAATAATGCTGGAATACC  
TGATCTGATGGAGCTGTAAGCTGGAATTTCAATGCACTGGTCGGTCTATTTTTCCCTGCTGTAACCTGGAATTAT  
GGCAGGTTCAAATCGCTCTGCTTCATTGAGAGACTCAACGTCAATTCCTGTTGGAACATTGGCTGCGACTCTTT  
CTACTTCTGCAATGTACCTATTTTCTGTGCTTTTATTGGATCTCTAGCAACAAGGGAGAAACTTTTGACAGACA  
GGCTACTAACTGCTACAATTGCTTGGCCTTTACCGGCAATTTTACATTGGAATTATCCTTTCAACCTTAGGGGCG  
GCTCTTCAAAGCCTTACAGGTGCTCCACGGCTGCTTGCAGCAATAGCCAATGATGATATCCTTCTGTTCTTCATTA  
CTTCAGAGTTGCTGAAGGGAGTGAACCTCATATTGCAACCCTCTTACTGCATTAATCTGTATTGGGTGTGCATAA  
TCGGGAATCTGGATCTTATCACACCAACAATTACCATGTTTTCTTTTGTGTTATGCTGGTGTGAACCTTGTCTTGT  
TCCTTCTGGATCTTCTAGATGCTCCAGTTGGCGTCCACGATGGAAATTTCACTGAGCCTCTCTCTTCTTGGGA  
GCAGTTCTTTGTATAGTGATCATGTTCTTGATATCTTGGTCATTTACTGTGGTGTCCCTAGCCCTTGCAAGTCTCATA  
TATTATTATGTATGCATCAAAGGGAAGGCTGGGACTGGGGTGTGGCTTCAAGAGTGCATATTTCCAAGTACGCC  
TTCGTAGTCTTCGATCACTGGGGGCAAGCCAAGTGCACCCAAAGAACTGGTATCCTATCCCCTCATATTCTGCCG  
GCCATGGGGGAAGCTGCCAGAGAATGTGCCCTGCCACCCTAAATTAGCTGACTTTGCTAACTGCATGAAGAAAA  
GGGTCGTGGAATGTCCATTTTGTCTCTATTTTAGATGGAGATTACCATGAGTGTGCAGAAGATGCCAAGACAGCC  
TGCAGGCAGCTGAGTACCTACATTGACTATAAGCGCTGTGAAGGTGTTGCAGAGATAGTTGTGGCCCCAGTATGT  
CAGATGGCTTCCGTGGCATTGTCCAAACTATGGGCCTAGGCAATCTTAAGCCGAACATTGTGGTCATGCGATACCC  
TGAAATATGGCGTCGGAAAACCTAATTGAAATCCCAGCTACCTTTGTTGGCATTAATAATGACTGCATTGTTGC  
AAACAAGGCAGTTGTGATTGTCAAGGCCTTGATGAATGGCCCAATGAGTATCAAAGGCAGTATGGTACTATTGA  
TCTGTATTGGATTGTGAGAGATGGGGCCCTTATGCTTCTCTCTCCAGCTCCTCCTTACCAAGGAGAGCTTTGAGA  
GTTGTAAGATTACAGTCTTCTGCATTGCGGAGGAGGATTCTGATGCAGAGGAGCTCAAGGCTGATGTCAAGAAGT  
TTTTGTATGATCTTCGCATGCATGCTGAAGTGATTGTTATATCGATGAAATCATGGGACGCCCAAGGAGAAGGAGT  
GTCCCAGCAAGATGAATCAATAGAGGCATTCACGGGTGCTCAGCGGCGGATTGCTGGTACTTGAGTGAGATGAA  
GGAGGCAGCTAAGAGGGAAGGAACTCCAAGTATGGCTGATGGGAAATCTGTGGTTGTGAATGAGCAACAGGTGG  
AGAAATTTCTTTACACAACACTGAAGCTTAATTGACAATACTTAGATACTCAAGAATGGCTGCAGTCGTGCTTGT  
GAGCTTACCACCACCACCTCTCAACCACCAGCGTATTTCTACATGGAGTACATGGATCTTTTGGTAGAGAATGTA  
CCTAGGCTTTTGATGGTAAGGGGATACCGTAGAGATGTTGTCACCCTTTTCACATAG

**Figure S4**

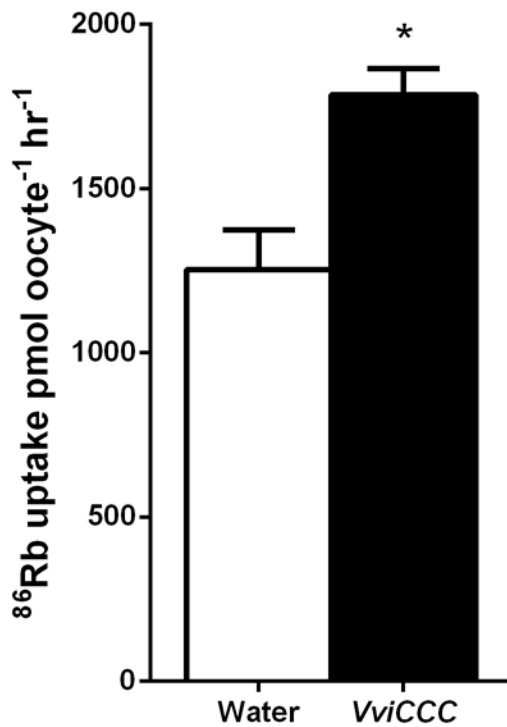

**Figure S4**

$^{86}\text{Rb}$  uptake by *Xenopus* oocytes in high K buffer. Oocytes injected with water (white bars) or cRNA encoding *VviCCC* (black bars) were bathed in radioactive uptake buffer containing  $^{86}\text{Rb}$  for 1 hour. Each data point is the mean  $\pm$  SEM of 10 oocytes. Asterisk indicates significant difference between water and *VviCCC* injected oocytes (t-test,  $P < 0.01$ ).

#### Method

Oocytes were preincubated in  $\text{Cl}^-$ -free ND96 for 2 hours before the experiment ( $\text{Cl}^-$  replaced with gluconate). Oocytes were then transferred to  $\text{K}^+$  and  $\text{Cl}^-$ -free ND96 plus ouabain for 10 minutes to block the  $\text{Na}^+/\text{K}^+$  ATPase. Oocytes were then transferred to flux buffer for 60 minutes. Oocytes were washed 3 times in ice cold flux buffer without isotope, and dissolved overnight in 10 % SDS. Uptake was then measured by scintillation counting. The flux buffer contained: 96 mM KCl; 2 mM NaCl; 1.8 mM  $\text{CaCl}_2$ ; 1 mM  $\text{MgCl}_2$ , 5 mM HEPES pH 7.4 Tris, 1 mM Ouabain, 2  $\mu\text{Ci/ml}$   $^{86}\text{Rb}$ .



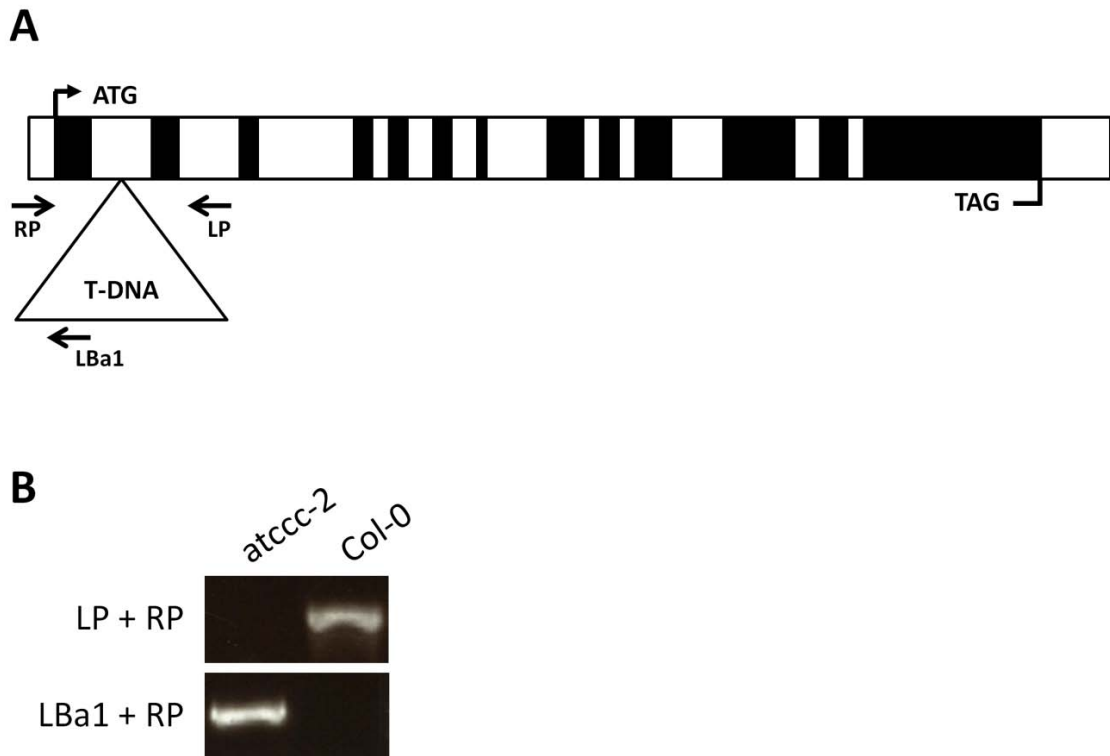

**Figure S5**

Confirmation of a homozygous T-DNA insertion in the Arabidopsis mutant line Salk\_145300. (A) Schematic representation of *AtCCC* gene structure with black boxes representing exons and position of the T-DNA insertion (triangle) and primers (arrows) shown. (B) PCR of genomic DNA to confirm homozygosity.

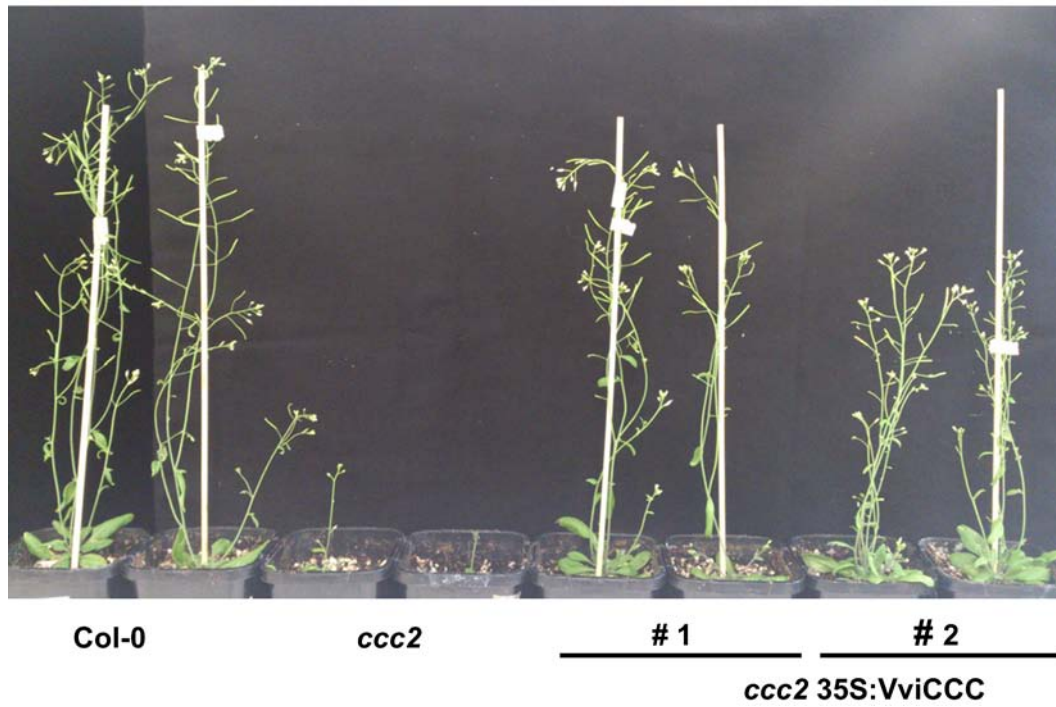

**Figure S6**

Complementation of the *ccc* phenotype with *VviCCC*. Two plants of each Arabidopsis line are shown for further confirmation of the ability of *VviCCC* to complement the *atccc* phenotype.

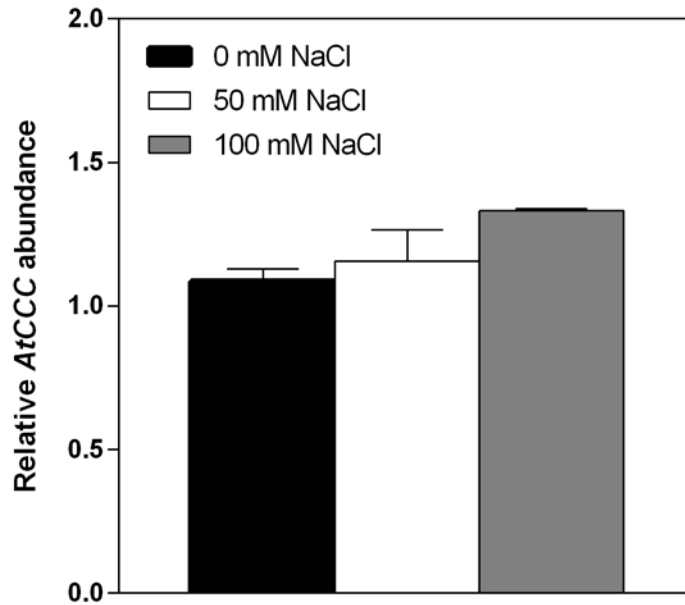

**Figure S7**

*AtCCC* is not regulated by salt stress in Arabidopsis roots. Quantitative real time PCR of whole roots of hydroponically grown, 5-week old wild-type Columbia-0 exposed to 0 mM (black bars), 50 mM (white bars) or 100 mM (grey bars) NaCl for 7 days. Bars represent the mean of 3 biological replicates  $\pm$  SEM. Data are relative to the untreated (0 mM NaCl) replicated with lowest transcript abundance (set to 1). No significant differences were observed between treatments (ANOVA with Tukey's post hoc test).

```

VviCCC MDCGDIENAEDE.....FCGQSCRKYPVYSRDL...AVLQWSSLDGSSSSLPV...PQSPFTNLISMQGNMSSDAREESSTNHEELGSERPESKLELFGFDSLVLNIGLRSMTCEA 108
CcCCC MDCNEDLGGEE.....FRAQLCRKYPVYAHDE...AVLQWSSMDGSSS.....DSSPKNVYIDGKENMSSDAREGAPDNLRVNGSERD SKLELFGFDSLVLNIGLRSMTCEG 103
NtAXI4 MHSDDNKEAIDGEDIETADDINQPTGVCHKYSPPVYAHVNDSSAVVEVSHHPCSSSSFF.....KHELKVVYGVQPNMASERREESAANHVINCPDRSKLELFGFDSLVLNIGLRSMTCEG 120
AtCCC MDCGDIENAEDE.....EFRSGPRLGSKYRPVYAHDE...AVVESSIDGSSSS.....LNKLVYVAPGDVAGV...GPEDC.VNCHKESKLELFGFDSLVLNIGLRSMTCEG 105
OsCCC1 MEGADLCAADDGVP.....VPAPNCRVYRVPYSSDR...AVIQWSSMDGSSS.....AVAAVSGITPQPPRNLTVPDMSQEDHTVSGQSKLELFGFDSLVLNIGLRSMTCEG 105
LtCCC WAGADLVEAGADG.....GRSSPICAKYRPVYAHDE...AVLEWSSIDGSSSSSSVIPDPPNLRKINVGSSSSASDAXGKSSHPQPQCPQDQSKLELFGFDSLVLNIGLRSMTCEG 115

VviCCC LAAPSSPR...DGEVSNTPRRSKANDLRLGTMGVFVPCQLQNLGIIYYIRF...VIVGMAGIGDQLLVVFCGCTFLTSLSLSAIATNGAMKGGGPPYILIGRALGPEVGVSTGLCFFLGNAAVAGSL 232
CcCCC IVAPSSPREGRDGEDAPITYPKPKSDVKLGTMGVFPCLQNLGIIYYIRF...VIVGMAGIGDQLLVVFCGCTFLTSLSLSAIATNGAMKGGGPPYILIGRALGPEVGVSTGLCFFLGNAAVAGM 230
NtAXI4 IQAPSSPR...DGEVVTTFEQPKPTADKSGTMGVFVPCQLQNLGIIYYIRF...VIVGMAGIGDQLLVVFCGCTFLTSLSLSAIATNGAMKGGGPPYILIGRALGPEVGVSTGLCFFLGNAAVAGM 244
AtCCC IQAPSSPR...DGEISITDGHKPKPALKGTMGVFPCLQNLGIIYYIRF...VIVGMAGIGDQLLVVFCGCTFLTSLSLSAIATNGAMKGGGPPYILIGRALGPEVGVSTGLCFFLGNAAVAGL 229
OsCCC1 IQAPSSPR...DGEVVAITCRPKETGPKGTMGVFPCLQNLGIIYYIRF...VIVGMAGIGDQLLVVFCGCTFLTSLSLSAIATNGAMKGGGPPYILIGRALGPEVGVSTGLCFFLGNAAVAGM 229
LtCCC VAAPSSPR...DGEITITPAELKPKPALRLGTMGVFVPCQLQNLGIIYYIRF...VIVGMAGIGDQLLVVFCGCTFLTSLSLSAIATNGAMKGGGPPYILIGRALGPEVGVSTGLCFFLGNAAVAGL 239

VviCCC YVVGAVETFLDALPAGLFGVVTIKVN.....GTEAAVAVPSPNHDQLQVYGVVITLCLFVFGGVKMINRVAPFLIPVLSLFCIFVGVAVARKDHPAVGVTLGSLKSLKNWSSVYQNTNN 352
CcCCC YVVGAVETFLKAVPAGMFRITIKVN.....GTATPEPQSPSLHDLQIYGVITLCLFVFGGVKMINRVAPFLIPVLSLFCIFVGVILLASKDDPAPGTTGLKKTCKDNWFSYQKNTN 350
NtAXI4 YVVGAVETFLNAPVAGLFRITIKVN.....GTDIAEPTSPSLHDLQIYGVITLCLFVFGGVKMINRVAPFLIPVLSLFCIFVGFSAHRHRPAPVGTGLNHESEKKNWSSVYQNTNN 364
AtCCC YVVGAVETFLKAVPAGLFRITIKVN.....GTAVSESTQSPNSHDLQVYGVITLCLFVFGGVKMINRVAPFLIPVLSLFCIFVGFIAKTDDEPDKGALQSLKSEKKNWSSVYQNTND 349
OsCCC1 YVVGAVETFLDAPVAGLFRITIKVNTLVNQTATSTATITSTPSSHDLQVYGVITLCLFVFGGVKMINRVAPFLIPVLSLFCIFVGFVAPRNAPKGTGLSLTTEKKNWSSVYQNTND 356
LtCCC YVVGAVETFLKAVPAGLFRITIKVN.....GTTIAQPLSPSSHDLQIYGVITLCLFVFGGVKMINRVAPFLIPVLSLFCIFVGFILAREHHPAEGITGLSEETLKNWSSVYQNTND 359

VviCCC AGIPDPDQAVSNFNALVGLFFPAVVTGIMAGSNRSASLKDQRSIPVGLTAAITSTAMVYFVSVLLFGSLATREKLLTDRLLTATIAWPLPAIHYGIILSTGAALQSLTGAPRLAAIANDDILP 479
CcCCC AGIPDPNKAQVSNFNALVGLFFPAVVTGIMAGSNRSASLKDQRSIPVGLTAAITTTTAYVIVSVLLFGSLAATREKLLTDRLLTATIAWPPAVHYGIILSTGAALQSLTGAPRLAAIANDDILP 477
NtAXI4 AGIPDPNKKIYDFNALVGLFFPAVVTGIMAGSNRSASLKDQRSIPVGLTAAITTTGIVYVSVLLFGVSTRKLLTDRLLSATVWPPPAIVVYGIILSTGAALQSLTGAPRLAAIANDDILP 491
AtCCC AGIPDPGCTIYDFNALVGLFFPAVVTGIMAGSNRSASLKDQRSIPVGLTAAITTTISLYIVSVLFGAVATREKLLTDRLLTATIAWPPPAIVHVYGIILSTGAALQSLTGAPRLAAIANDDILP 476
OsCCC1 AGIPDPNNSIYDFNALVGLFFPAVVTGIMAGSNRSASLKDQRSIPVGLTAAITTTTAMYFVSVLLFGSLAATREKLLTDRLLTATVWPPAVHYGIILSTGAALQSLTGAPRLAAIANDDILP 483
LtCCC AGIPDPDQAVSNFNALVGLFFPAVVTGIMAGSNRSASLKDQRSIPVGLTAAITVTFMYIVSVLFGSLAATREKLLTDRLLTATVWPPPSLIRHYGIILSTGAALQSLTGAPRLAAIANDDILP 486

VviCCC VLYYFVAVGSEPHIATFTALICIGCVIIGNLDDLTPITFMFLCYAGVNLSCFLDLDLAPSWRPRWKEHHWSLSLVGLICVIMFLISWSFTVSLALASLIYYVYCKKAGDWGDDGKSA 606
CcCCC VLYYFVAVGSEPHIATFTAFICIGCVIIGNLDDLTPITFMFLCYAGVNLSCFLDLDLAPSWRPRWKEHHWSLSLVGLICVIMFLISWSFTVSLALASLIYYVYCKKAGDWGDDGKSA 604
NtAXI4 VLYYFVAVGSEPHIATFTAFICIGCVIIGNLDDLTPITFMFLCYAGVNLSCFLDLDLAPSWRPRWKEHHWSLSLVGLICVIMFLISWSFTVSLALASLIYYVYCKKAGDWGDDGKSA 618
AtCCC VLYYFVAVGSEPHIATFTAFICIGCVIIGNLDDLTPITFMFLCYAGVNLSCFLDLDLAPSWRPRWKEHHWSLSLVGLICVIMFLISWSFTVSLALASLIYYVYCKKAGDWGDDGKSA 603
OsCCC1 VLYYFVAVGSEPHIATFTAFICIGCVIIGNLDDLTPITFMFLCYAGVNLSCFLDLDLAPSWRPRWKEHHWSLSLVGLICVIMFLISWSFTVSLALASLIYYVYCKKAGDWGDDGKSA 610
LtCCC VLYYFVAVGSEPHIATFTAFICIGCVIIGNLDDLTPITFMFLCYAGVNLSCFLDLDLAPSWRPRWKEHHWSLSLVGLICVIMFLISWSFTVSLALASLIYYVYCKKAGDWGDDGKSA 613

VviCCC YFQLALRSLRSLGASQVHPKNWYPIPLFCRPPWGLPENVPCHPKLADFANCMKKKGRGMSIFVSIIDGDYHECAEADAKACRQLSTYIDYKRCGVAEIVVAPNMSGFRGIVQTMGLGNLKNPIV 733
CcCCC YFQLALRSLRSLGASQVHPKNWYPIPLFCRPPWGLPENVPCHPKLADFANCMKKKGRGMSIFVSIIDGDYHECAEADAKACRQLSTYIDYKRCGVAEIVVAPNMSGFRGIVQTMGLGNLKNPIV 731
NtAXI4 YFQLALRSLRSLGASQVHPKNWYPIPLFCRPPWGLPENVPCHPKLADFANCMKKKGRGMSIFVSIIDGDYHECAEADAKACRQLSTYIDYKRCGVAEIVVAPNMSGFRGIVQTMGLGNLKNPIV 745
AtCCC YFQLALRSLRSLGASQVHPKNWYPIPLFCRPPWGLPENVPCHPKLADFANCMKKKGRGMSIFVSIIDGDYHECAEADAKACRQLSTYIDYKRCGVAEIVVAPNMSGFRGIVQTMGLGNLKNPIV 730
OsCCC1 YFQLALRSLRSLGASQVHPKNWYPIPLFCRPPWGLPENVPCHPKLADFANCMKKKGRGMSIFVSIIDGDYHECAEADAKACRQLSTYIDYKRCGVAEIVVAPNMSGFRGIVQTMGLGNLKNPIV 737
LtCCC YFQLALRSLRSLGASQVHPKNWYPIPLFCRPPWGLPENVPCHPKLADFANCMKKKGRGMSIFVSIIDGDYHECAEADAKACRQLSTYIDYKRCGVAEIVVAPNMSGFRGIVQTMGLGNLKNPIV 740

VviCCC VMRYPEIWRRENLTIPATFVGIINDCIVANKAVVIKGLDEWPNEYQRYGTIDLYWIVRDGGLMLLLSQLLLTKEFSFESCKIQVFCIAEEDSDAEGLKADVKKFLYDLRMAEIVVIMKSMDAQ 860
CcCCC VMRYPEIWRRENLTIPATFVGIINDCIVANKAVVIKGLDEWPNEYQRYGTIDLYWIVRDGGLMLLLSQLLLTKEFSFESCKIQVFCIAEEDSDAEGLKADVKKFLYDLRMAEIVVIMKSMDAQ 858
NtAXI4 VMRYPEIWRRENLTIPATFVGIINDCIVANKAVVIKGLDEWPNEYQRYGTIDLYWIVRDGGLMLLLSQLLLTKEFSFESCKIQVFCIAEEDSDAEGLKADVKKFLYDLRMAEIVVIMKSMDAQ 872
AtCCC VMRYPEIWRRENLTIPATFVGIINDCIVANKAVVIKGLDEWPNEYQRYGTIDLYWIVRDGGLMLLLSQLLLTKEFSFESCKIQVFCIAEEDSDAEGLKADVKKFLYDLRMAEIVVIMKSMDAQ 857
OsCCC1 VMRYPEIWRRENLTIPATFVGIINDCIVANKAVVIKGLDEWPNEYQRYGTIDLYWIVRDGGLMLLLSQLLLTKEFSFESCKIQVFCIAEEDSDAEGLKADVKKFLYDLRMAEIVVIMKSMDAQ 864
LtCCC VMRYPEIWRRENLTIPATFVGIINDCIVANKAVVIKGLDEWPNEYQRYGTIDLYWIVRDGGLMLLLSQLLLTKEFSFESCKIQVFCIAEEDSDAEGLKADVKKFLYDLRMAEIVVIMKSMDAQ 867

VviCCC GEGVSVQ...QDESIEATCAQRRTAGVISEMKEAKREGTPLMADGKSVVNVNEQVQEKFLYITLKLNSTILRYSRMAAVVLSLPPPLIHPAYFYMEYMDLLVENPRMLIVRGYRRDVVTLFT 982
CcCCC TENGFPQ...QDESLEAFAAQRRIKNYIAEMKEAQKSGTPLMADGKSVVNVNEQVQEKFLYITLKLNSTILRYSRMAAVVLSLPPPLIHPAYFYMEYMDLLVENPRMLIVRGYRRDVVTLFT 980
NtAXI4 GE...QDESVEAFAAQRRTAGVISEMKEAKREGTPLMADGKSVVNVNEQVQEKFLYITLKLNSTILRYSRMAAVVLSLPPPLIHPAYFYMEYMDLLVENPRMLIVRGYRRDVVTLFT 990
AtCCC SFGNS...QDESLEAFAAQRRTAGVISEMKEAKREGTPLMADGKSVVNVNEQVQEKFLYITLKLNSTILRYSRMAAVVLSLPPPLIHPAYFYMEYMDLLVENPRMLIVRGYRRDVVTLFT 975
OsCCC1 MESSSSGAPQDESVEAFAAQRRTAGVISEMKEAKREGTPLMADGKSVVNVNEQVQEKFLYITLKLNSTILRYSRMAAVVLSLPPPLIHPAYFYMEYMDLLVENPRMLIVRGYRRDVVTLFT 989
LtCCC DPGSP...QDESLEAFAAQRRTAGVISEMKEAKREGTPLMADGKSVVNVNEQVQEKFLYITLKLNSTILRYSRMAAVVLSLPPPLIHPAYFYMEYMDLLVENPRMLIVRGYRRDVVTLFT 988

```

**Figure S8**

Multiple sequence alignment of six plant CCC family members. This alignment was used to generate the alignment and neighbour joining tree of Figure 1A. Shading is white (non-similar), light grey (similar), dark grey (> 50% conserved) and black (all match).

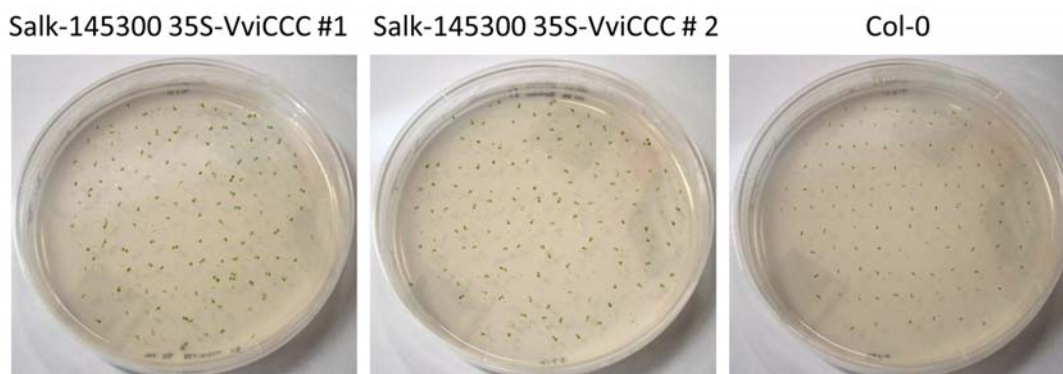

**Salk-145300 35S:VviCCC # 1**

For 1 insertion segregating at 3:1 ratio

|              | Observed      | Expected      | (Obs-Exp) <sup>2</sup> /Exp |
|--------------|---------------|---------------|-----------------------------|
| Resistant    | 110.00        | 101.25        | 0.76                        |
| Sensitive    | 25.00         | 33.75         | 2.27                        |
| <b>Total</b> | <b>135.00</b> | <b>135.00</b> | <b>3.02</b>                 |

$\chi^2 = 3.02$  for 1 d.f.  
 $0.05 < P < 0.1$ . Not significant deviation from expected.

**Salk-145300 35S:VviCCC # 2**

For 2 insertions segregating at 15:1 ratio

|              | Observed      | Expected      | (Obs-Exp) <sup>2</sup> /Exp |
|--------------|---------------|---------------|-----------------------------|
| Resistant    | 119.00        | 120.94        | 0.03                        |
| Sensitive    | 10.00         | 8.06          | 0.47                        |
| <b>Total</b> | <b>129.00</b> | <b>129.00</b> | <b>0.50</b>                 |

$\chi^2 = 0.5$  for 1 d.f.  
 $0.3 < P < 0.5$ . Not significant deviation from expected.

**Figure S9**

Identification of T-DNA copy number in complemented Arabidopsis mutants. (Upper panel) Two independent transformants from the T2 generation were grown on MS Agar plates containing hygromycin ( $15 \mu\text{g}\cdot\text{ml}^{-1}$ ). (Lower panel) number of T-DNA inserts was estimated by measuring Mendelian segregation ratios and performing chi square analysis.
